# Supplementary material
Source: Springer Nature journal article supplement (https://www.springermedizin.de/resource/supplementary/12916_2013_888_MOESM17_ESM.pdf/9598866)
Supplement: MOESM17 [file 9598866]

| Adult Causes                                                                         | Tariff |        | SSP    |        | RF     |        | PCVA   |        | InterVA |        |
|--------------------------------------------------------------------------------------|--------|--------|--------|--------|--------|--------|--------|--------|---------|--------|
|                                                                                      | No HCE | HCE    | No HCE  | HCE    |
|                                                                                      | Median  | Median |
| <b>GBD Cause Group A: Communicable, maternal, neonatal and nutritional disorders</b> |        |        |        |        |        |        |        |        |         |        |
| AIDS                                                                                 | 20.8   | 52.5   | 21.1   | 57.1   | 34.2   | 55.3   | 33.6   | 66.7   | 19.8    | 19.5   |
| Diarrhea/Dysentery                                                                   | 35.1   | 40.4   | 47.3   | 43.3   | 38.6   | 44.4   | 39.4   | 30.4   | 7.1     | 7.1    |
| Malaria                                                                              | 32     | 59.1   | 30.6   | 52.5   | 12     | 32     | 25.4   | 32.7   | 5       | 9.8    |
| Maternal                                                                             | 66.7   | 69     | 85.8   | 90.2   | 72.8   | 77.3   | 55.9   | 62.2   | 46.1    | 45.7   |
| Other Infectious Diseases                                                            | 6.1    | 18.4   | 5.5    | 9.3    | 20     | 22.7   | 15.1   | 34     | 8.2     | 7.1    |
| Pneumonia                                                                            | 7.4    | 17.7   | 4.5    | 4.9    | 22     | 31.3   | 20     | 19     | 33.6    | 33.2   |
| TB                                                                                   | 23.3   | 45.2   | 30.1   | 48.4   | 31.8   | 46.9   | 38.4   | 48.7   | 55.9    | 55.2   |
| <b>GBD Cause Group B: Non-communicable diseases</b>                                  |        |        |        |        |        |        |        |        |         |        |
| Acute Myocardial Infarction                                                          | 42.9   | 46     | 38.2   | 45.1   | 39.2   | 47.5   | 38.7   | 57.2   | 20.3    | 18.5   |
| Asthma                                                                               | 33.3   | 58.3   | 26.5   | 67.5   | 8.3    | 33.3   | 7      | 46.9   | 14.7    | 14.7   |
| Breast Cancer                                                                        | 71.4   | 75.5   | 80.6   | 88.9   | 67.3   | 79.2   | 60     | 65.1   | 44.6    | 44.1   |
| Cervical Cancer                                                                      | 70.3   | 76.5   | 69.4   | 77.9   | 53.1   | 64.1   | 23.2   | 37.5   | 55.8    | 56.6   |
| Cirrhosis                                                                            | 19.7   | 52.6   | 46.5   | 58.1   | 50     | 62.8   | 41     | 45.7   | 11.8    | 22.2   |
| Colorectal Cancer                                                                    | 8      | 20     | 16.8   | 31.3   | 8      | 20     | 11.4   | 35.9   |         |        |
| CPD                                                                                  | 23.3   | 41.9   | 23.4   | 51     | 20.9   | 44.4   | 21.4   | 40     | 23.2    | 22.7   |
| Diabetes                                                                             | 33     | 52.4   | 35.9   | 70.3   | 36.4   | 64.3   | 17     | 58.2   | 20.5    | 19.7   |
| Epilepsy                                                                             | 41.7   | 58.3   | 67.7   | 73.4   | 41.7   | 50     | 14.9   | 23.6   | 21      | 18.4   |
| Esophageal Cancer                                                                    | 60     | 80     | 75     | 80.2   | 58.6   | 60     | 43.9   | 46.9   |         |        |
| Leukemia/Lymphomas                                                                   | 20.5   | 36.8   | 12.1   | 38.7   | 22.2   | 41.7   | 5.8    | 26.1   |         |        |
| Lung Cancer                                                                          | 15.4   | 30.8   | 19.7   | 49.3   | 25     | 46.2   | 11.4   | 40.2   | 7.5     | 7.5    |
| Other Cardiovascular Diseases                                                        | 19     | 39.1   | 12     | 29.2   | 19.4   | 36.5   | 12.3   | 30.6   | 34.4    | 33.5   |
| Other Non-communicable Diseases                                                      | 9.7    | 17.1   | 10.5   | 15.6   | 16.4   | 23.4   | 24.5   | 44.3   | 23.6    | 23.9   |
| Prostate Cancer                                                                      | 50     | 66.7   | 58.1   | 74.9   | 25     | 50     | 0      | 21.1   |         |        |
| Renal Failure                                                                        | 7.8    | 31     | 1.8    | 18.5   | 17.6   | 42.9   | 10.7   | 23.5   | 0.7     | 7.7    |
| Stomach Cancer                                                                       | 18.8   | 31.3   | 7      | 31.1   | 13.3   | 12.5   | 3.3    | 26.8   | 32.2    | 32.6   |
| Stroke                                                                               | 45     | 51.8   | 47.1   | 53.2   | 55.4   | 60.6   | 40.1   | 58.9   | 42.5    | 46.6   |
| <b>GBD Cause Group C: Injuries</b>                                                   |        |        |        |        |        |        |        |        |         |        |
| Bite of Venomous Animal                                                              | 87.5   | 81.3   | 94.2   | 100    | 80     | 87.5   | 81     | 100    | 67.5    | 62.8   |
| Drowning                                                                             | 84.6   | 81.8   | 85.1   | 87.2   | 76.9   | 80.8   | 54.9   | 68     | 33.3    | 32.9   |
| Falls                                                                                | 59.5   | 60.5   | 46.4   | 58     | 46.5   | 55.8   | 48.7   | 46.2   | 25      | 25.6   |
| Fires                                                                                | 73.3   | 72.7   | 67.3   | 75     | 43.3   | 56.7   | 42.1   | 42.4   | 14.7    | 13.8   |
| Homicide                                                                             | 73     | 79.4   | 77.5   | 80     | 69     | 73.8   | 61.7   | 61.7   | 54.6    | 54.6   |
| Other Injuries                                                                       | 69.2   | 73.1   | 64     | 65.1   | 57.7   | 65.4   | 47.8   | 52.9   | 0       | 0      |
| Poisonings                                                                           | 36.4   | 59.1   | 53.3   | 54.9   | 50     | 54.5   | 13.5   | 7.5    | 4.9     | 4.9    |
| Road Traffic                                                                         | 77.7   | 82     | 77.9   | 82     | 68.3   | 76     | 71.2   | 82.9   | 36.2    | 35.1   |
| Suicide                                                                              | 10     | 12.5   | 24.7   | 28.3   | 29     | 30.4   | 49.5   | 66.7   | 10.6    | 12.5   |
